# Supplementary material for: Diversity of three bunya-like viruses infecting apple
Source: Springer Nature journal article supplement (doi:10.1007/s00705-018-3999-z), 2018-08-21
Supplement: MOESM1 [file 16061628]

## Sheet: Sheet1
Table S1. Primers used for sequencing and RT-PCR for CCGaV.
Name	Sequence	Description
AW73	GAAGAATGGGCAACTGTCCA	RNA2 gap 1 forward
AW74	GACAGATCACCGTCGTCAG	RNA2 gap 1 reverse
AW75	GCAGTTTAGAGATCCTTTAGTAC	RNA2 gap 2 forward
AW76	CTGCTATCCACTGCTAGAG	RNA2 gap 2 reverse
AW77	GTATTCAGCATCAGAAGTAGTCTG	RNA2 gap 3 forward
AW78	GATAGGAGCTACTTTCCCTGGA	RNA2 gap 3 reverse
AW79	GTCCTGCTCCGATCAGCTTTCTAG	RNA2 3' end sequencing primer
AW86	CTCTAGCAGTGGATAGCAG	Nucleocapsid protein forward primer 1
AW87	GACCATCAGGGATTCAAGC	Nucleocapsid protein reverse primer 1
AW88	CTGAGATTATAGCGAGAACTCA	RNA1 pol forward primer 1
AW89	CTAGTTGCACCAGGGTTC	RNA1 pol reverse primer 1
CCGaV Gap1.1 F	GGCACTAACTCCAAATTCAGCAG	RNA1 gap 1 forward
CCGaV Gap1.1 R	GGTTCATGGGCCTTCTATTGTC	RNA1 gap 1 reverse
CCGaV Gap2.1 F	TGACAATAGAAGGCCCATGAAC	RNA1 gap 2 forward
CCGaV Gap2.1 R	GCAGATGATGAAGTGGATGAGG	RNA1 gap 2 reverse
CCGaV Gap3&4.1 F	CCTCATCCACTTCATCATCTGC	RNA1 gaps 3 and 4 forward
CCGaV Gap3&4.1 R	TTAAGGACTCTTGGGCCACTTC	RNA1 gaps 3 and 4 reverse
CCGaV Gap5.2 F	TTGTGAACCACTTCCTTAGCACTC	RNA1 gap 5 forward
CCGaV Gap5.2 R	TGCAAAGTCCTCATCTTTATTTAATTC	RNA1 gap 5 reverse
CCGaV Gap6.1 F	AACCTACCAATTCCAAACCATC	RNA1 gap 6 forward
CCGaV Gap6.1 R	TGATTTCCAGACCATGCGTATC	RNA1 gap 6 reverse
CCGaV Gap7.1 F	CTTTGCTTCTGACCATGCTTTG	RNA1 gap 7 forward
CCGaV Gap7.1 R	GACCAACTAGACCCTGCTTTGG	RNA1 gap 7 reverse
CCGaV Gap8.1 F	GACCTCTGCCATAATCTGTGGAC	RNA1 gap 8 forward
CCGaV Gap8.1 R	TGCAATATAACAGTTGTGCAAGG	RNA1 gap 8 reverse
CCGaV Gap9&10.1 F	TCATCACTTCCTTGCACAACTG	RNA1 gaps 9 and 10 forward
CCGaV Gap9&10.1 R	TCTCAGCATGGAGGAGATAGGG	RNA1 gaps 9 and 10 reverse
CCGaV Gap11.1 F	TGGGTGGGTTAGTGTATCTGAGG	RNA1 gap 11 forward
CCGaV Gap11.1 R	CAAATCTGGATGACTCTATGACG	RNA1 gap 11 reverse
CCGaV Gap12&13.1 F	CAGATCCTTCATCATCTTATTCGTC	RNA1 gaps 12 and 13 forward
CCGaV Gap12&13.1 R	TTGCAGGGATTCTCTTGTTATTC	RNA1 gaps 12 and 13 reverse
CCGaV Gap14.3 F	TTTACAAAGTGCTCAATGCTAGG	RNA1 gap 14 forward
CCGaV Gap14.3 R	GCTAAGTCAGCCGATGATAAGAAG	RNA1 gap 14 reverse
CCGaV Gap15.1 F	ATGTCACTTGTCTCCGTCAAAG	RNA1 gap 15 forward
CCGaV Gap15.1 R	GGCCACTCTAGCAGAATCAACC	RNA1 gap 15 reverse
CCGaV Gap16.1 F	TCATAGGGATGTTTGTGATCCTC	RNA1 gap 16 forward
CCGaV Gap16.1 R	TGCAGATGAAGCGATTGTTAAAG	RNA1 gap 16 reverse
CCGaV Gap17.1 F	TTGCAGTAAACCCTAGATGGAGAC	RNA1 gap 17 forward
CCGaV Gap17.1 R	TAAGTGTTAATGGCCGGGAGAG	RNA1 gap 17 reverse
CCGaV RNA1 3'R	ACACACAGATCCCAAACTATTTTTAGTTAACGC	RNA1 3'tail reverse
CCGaV 3' tail	GACTATTTCATGGCGAATCTTCC	RNA1 3' tail forward
CCGaV RNA1 5'F	ACACAAAGACTCCCAAACC	RNA1 5' end forward
CCGaV 5' end	AAAGGCTGAGTTGGACACACAC	RNA1 5' end reverse
